# Supplementary material for: Association of zinc level and polymorphism in MMP-7 gene with prostate cancer in Polish population
Source: PubMed Central journal article supplement (PMC6056054; doi:10.1371/journal.pone.0201065), 2018-07-23
Supplement: pone.0201065.s001.pdf [file pone.0201065.s001.pdf]

S1 Table. Characteristic of prostate cancer cases and controls included in the study.

| <b>Characteristic</b>                     | <b>Cases (n=197)</b>  | <b>Controls (n=197)</b> | <b>p-value*</b> |
|-------------------------------------------|-----------------------|-------------------------|-----------------|
| Mean year of birth (range)                | 1946 (1926 –<br>1962) | 1946 (1931-1960)        | 0.60            |
| Smoking, n (%)                            |                       |                         |                 |
| Yes (current + past)                      | 136 (69)              | 132 (67)**              | -               |
| No (never smokers)                        | 61 (31)               | 65 (33)**               | -               |
| Pack-years (range)                        | 15.73 (0-80)          | 15.39 (0-80)            | 0.94            |
| Prostate cancer among I° relatives, n (%) |                       |                         |                 |
| Yes                                       | 20 (10)               | 20 (10)                 | -               |
| No                                        | 177 (90)              | 177 (90)                | -               |
