# Supplementary material for: Association of zinc level and polymorphism in MMP-7 gene with prostate cancer in Polish population
Source: PubMed Central journal article supplement (PMC6056054; doi:10.1371/journal.pone.0201065), 2018-07-23
Supplement: pone.0201065.s002.pdf [file pone.0201065.s002.pdf]

S2 Table. Serum Zn concentration and prostate cancer occurrence.

| <b>Zn level (µg/l)</b> | <b>Cases (%) n=197</b> | <b>Controls (%) n=197</b> | <b>OR* (95% CI)</b>     | <b>p-value</b>  |
|------------------------|------------------------|---------------------------|-------------------------|-----------------|
| <753.9                 | 35 (18)                | 63 (32)                   | 1                       | -               |
| 753.9-853.0            | 46 (23)                | 52 (27)                   | <b>1.96 (1.02-3.76)</b> | <b>0.04</b>     |
| 853.0-973.9            | 61 (31)                | 38 (19)                   | <b>4.41 (2.07-9.37)</b> | <b>&lt;0.01</b> |
| >973.9                 | 55 (28)                | 44 (22)                   | <b>3.39 (1.63-7.26)</b> | <b>&lt;0.01</b> |

\*Multivariable logistic regression adjusted for 5 tested SNPs.
