# Supplementary material for: Association of zinc level and polymorphism in MMP-7 gene with prostate cancer in Polish population
Source: PubMed Central journal article supplement (PMC6056054; doi:10.1371/journal.pone.0201065), 2018-07-23
Supplement: pone.0201065.s003.pdf [file pone.0201065.s003.pdf]

S3 Table. Polymorphisms and prostate cancer risk.

|                         | Cases (%), n=197 | Controls (%),<br>n=197 | OR* (95%CI)             | p-value     |
|-------------------------|------------------|------------------------|-------------------------|-------------|
| <b>MMP-1 rs1799750</b>  |                  |                        |                         |             |
| 1G/1G                   | 56 (28.4)        | 54 (27.4)              | 1                       | -           |
| 1G/2G                   | 105 (53.3)       | 90 (45.7)              | 1.24 (0.76-2.02)        | 0.39        |
| 2G/2G                   | 36 (18.3)        | 53 (26.9)              | 0.73 (0.41-1.28)        | 0.27        |
| <b>MMP-2 rs243865</b>   |                  |                        |                         |             |
| CC                      | 104 (52.8)       | 101 (51.3)             | 1                       | -           |
| CT                      | 79 (40.1)        | 78 (39.6)              | 0.95 (0.61-1.48)        | 0.82        |
| TT                      | 14 (7.1)         | 18 (9.1)               | 0.76 (0.32-1.82)        | 0.54        |
| <b>MMP-7 rs11568818</b> |                  |                        |                         |             |
| AA                      | 59 (29.9)        | 76 (38.6)              | 1                       | -           |
| AG                      | 100 (50.8)       | 97 (49.2)              | 1.27 (0.80-2.02)        | 0.31        |
| GG                      | 38 (19.3)        | 24 (12.2)              | <b>2.03 (1.07-3.86)</b> | <b>0.03</b> |
| <b>MMP-13 rs2252070</b> |                  |                        |                         |             |
| TT                      | 92 (46.7)        | 104 (52.8)             | 1                       | -           |
| CT                      | 87 (44.2)        | 78 (39.6)              | 1.16 (0.74-1.81)        | 0.51        |
| CC                      | 18 (9.1)         | 15 (7.6)               | 1.39 (0.64-3.02)        | 0.40        |
| <b>MT2A rs28366003</b>  |                  |                        |                         |             |
| AA                      | 179 (90.9)       | 176 (89.3)             | 1                       | -           |
| AG + GG**               | 18 (9.1)         | 21 (10.7)              | 0.73 (0.35-1.52)        | 0.40        |

\*Multivariable logistic regression adjusted for Zn level

\*\* Genotypes were summarized because of low number of GG genotype
